# Supplementary material
Source: PubMed Central journal article supplement (PMC2393760)

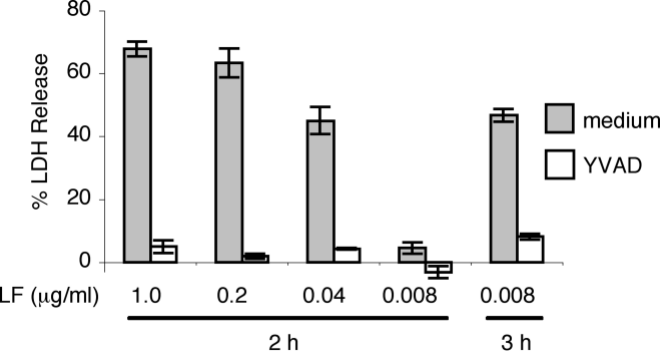

Supplement: pnas_0707370105_3.pdf [file pnas_0707370105_3.pdf]
